# Supplementary material for: Exploring the comorbidity mechanisms between atherosclerosis and hashimoto’s thyroiditis based on microarray and single-cell sequencing analysis
Source: Springer Nature journal article supplement (doi:10.1038/s41598-025-85112-0), 2025-01-13
Supplement: MOESM1 [file 41598_2025_85112_MOESM1_ESM.pdf]

A

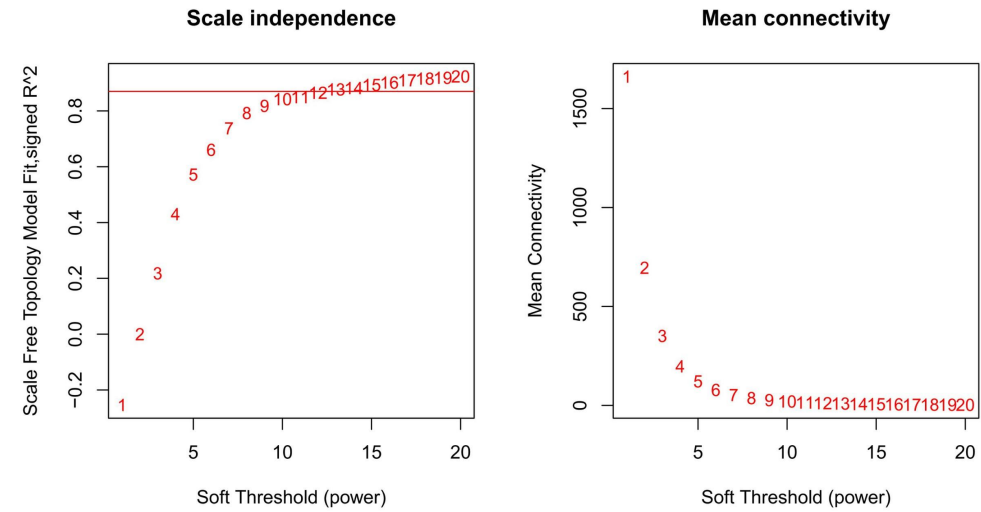

B

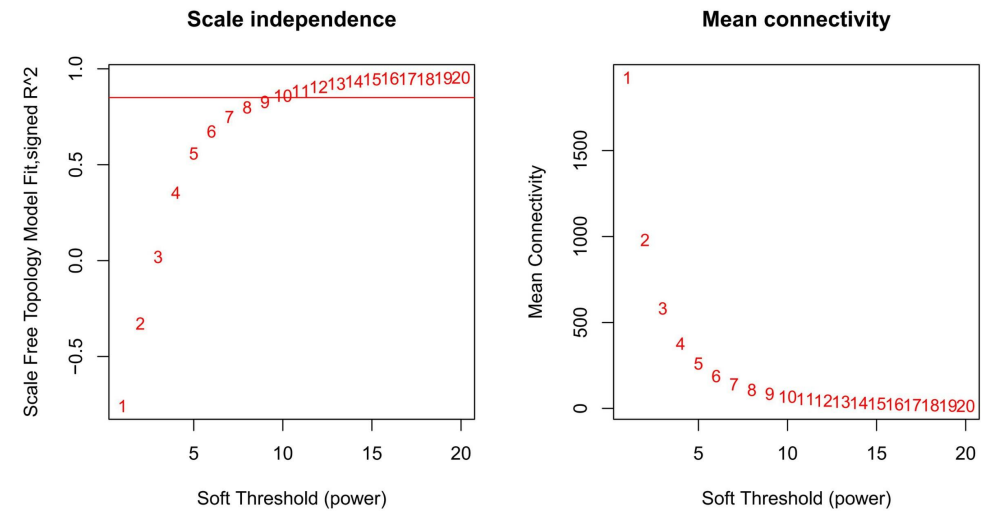

Supplementary File 1: (A) The determination of soft thresholding power in GSE28829. (B) The determination of soft thresholding power in GSE138198.
